# Supplementary material
Source: PubMed Central journal article supplement (PMC8803261)
Supplement: NIHMS1767284-supplement-Supplemental_Figures.pdf [file NIHMS1767284-supplement-Supplemental_Figures.pdf]

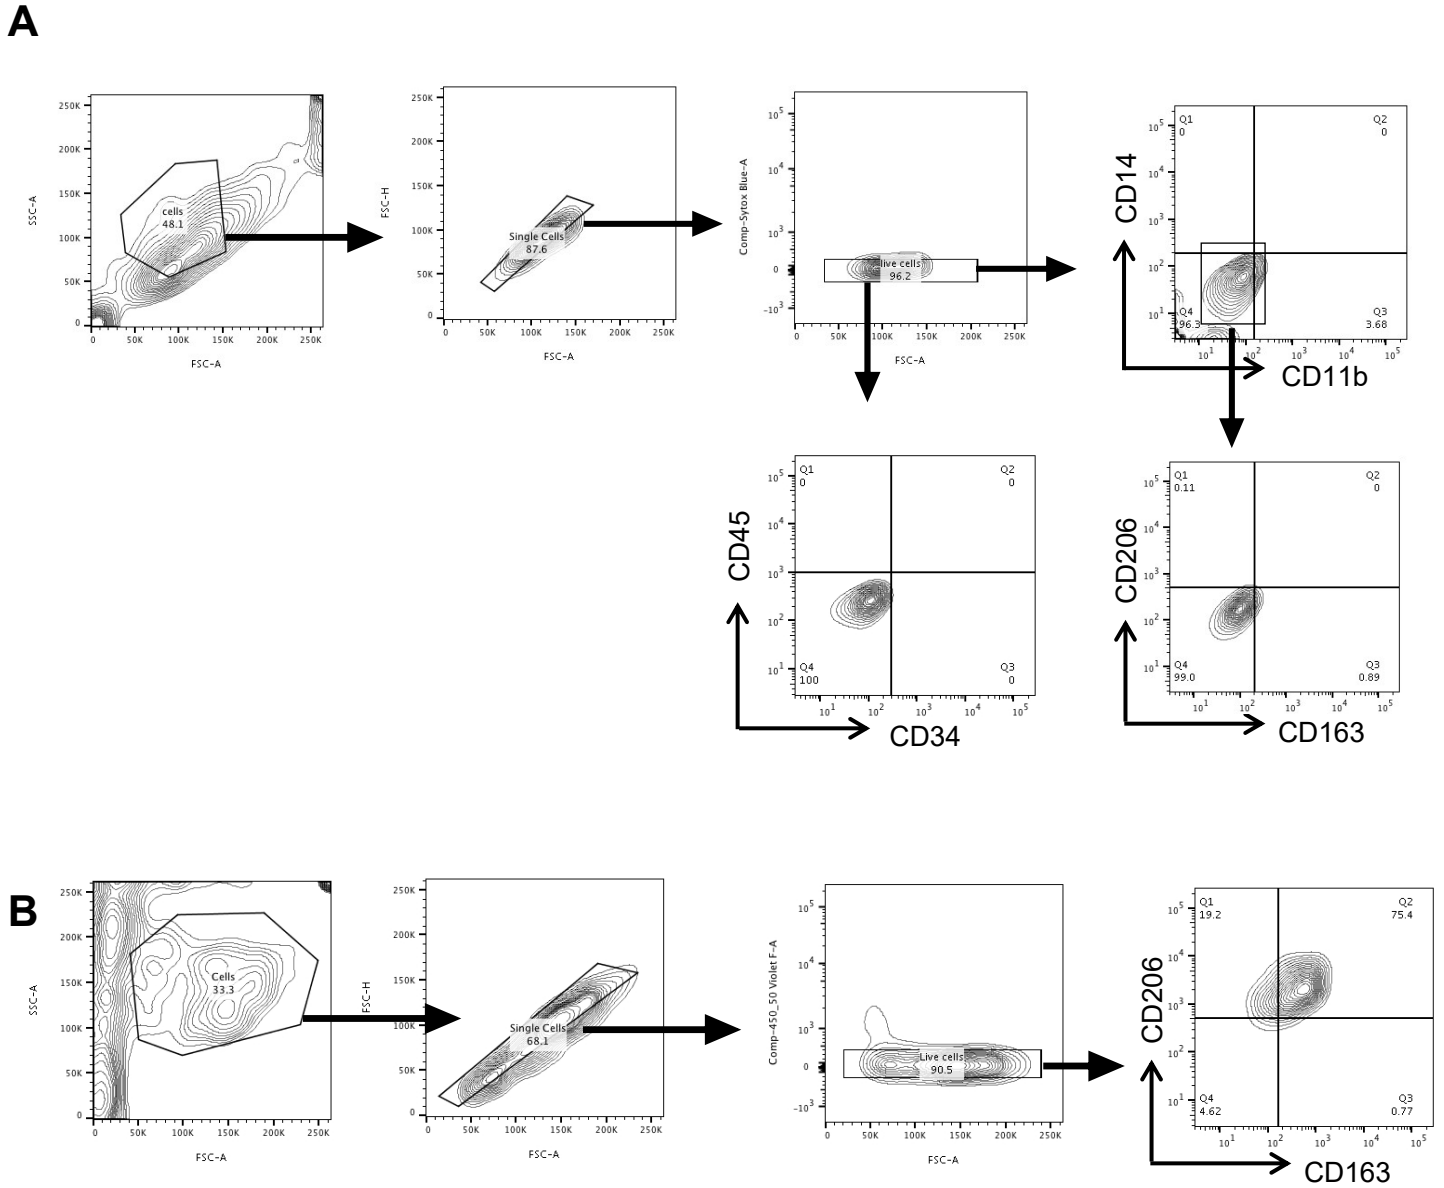

**Supplementary Fig. 1. FACS analysis of unstained 3D-iMACs as a control and primary monocyte-derived M2-like macrophages as a reference.**

A. Expression profiles of CD34, CD45, CD11b, CD14, CD206 and CD163 in unstained 3D-iMACs.

B. Primary monocyte-derived M2-like macrophages were analyzed as a reference for 3D-iMACs.

Primary M2-like macrophages show expression both of CD163/CD206, which is similar to that of 3D-iMACs shown in Fig.1C.

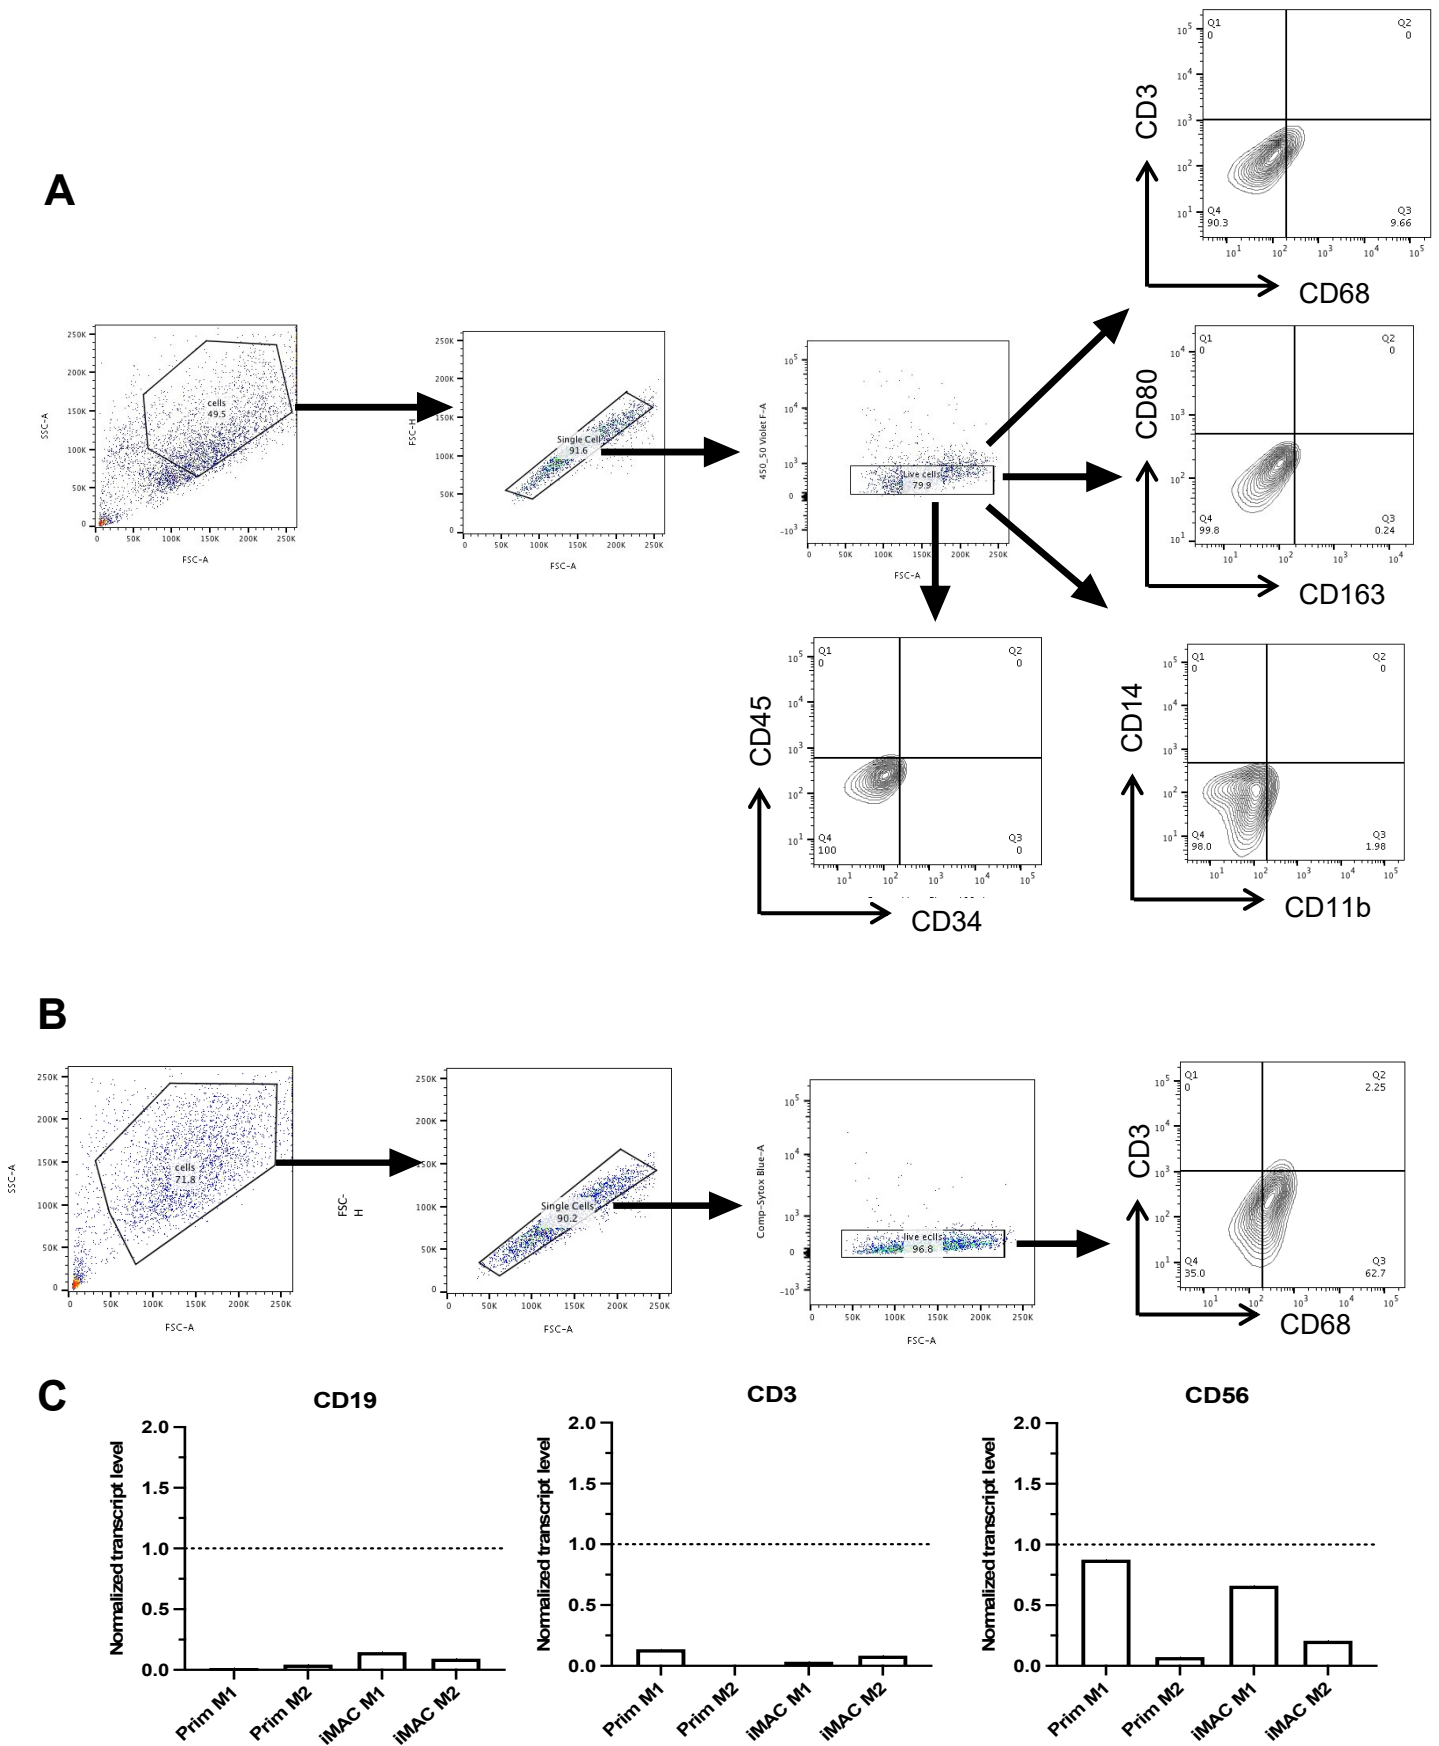

**Supplementary Fig. 2. FACS and qPCR analysis of unstained 2D-iMACs.**

A. Unstained control samples were analyzed to set the threshold for each surface marker.

B. CD68 and CD3 expression levels were analyzed in 2D-iMACs.

C. CD19, CD3, and CD56 expression of M1-like and M2-like 2D-iMACs are similar to that seen in the M1-like and M2-like macrophages from primary blood monocytes. N=1 biological replicate with technical triplicates, normalized to expression levels in undifferentiated 2D-iMACs.

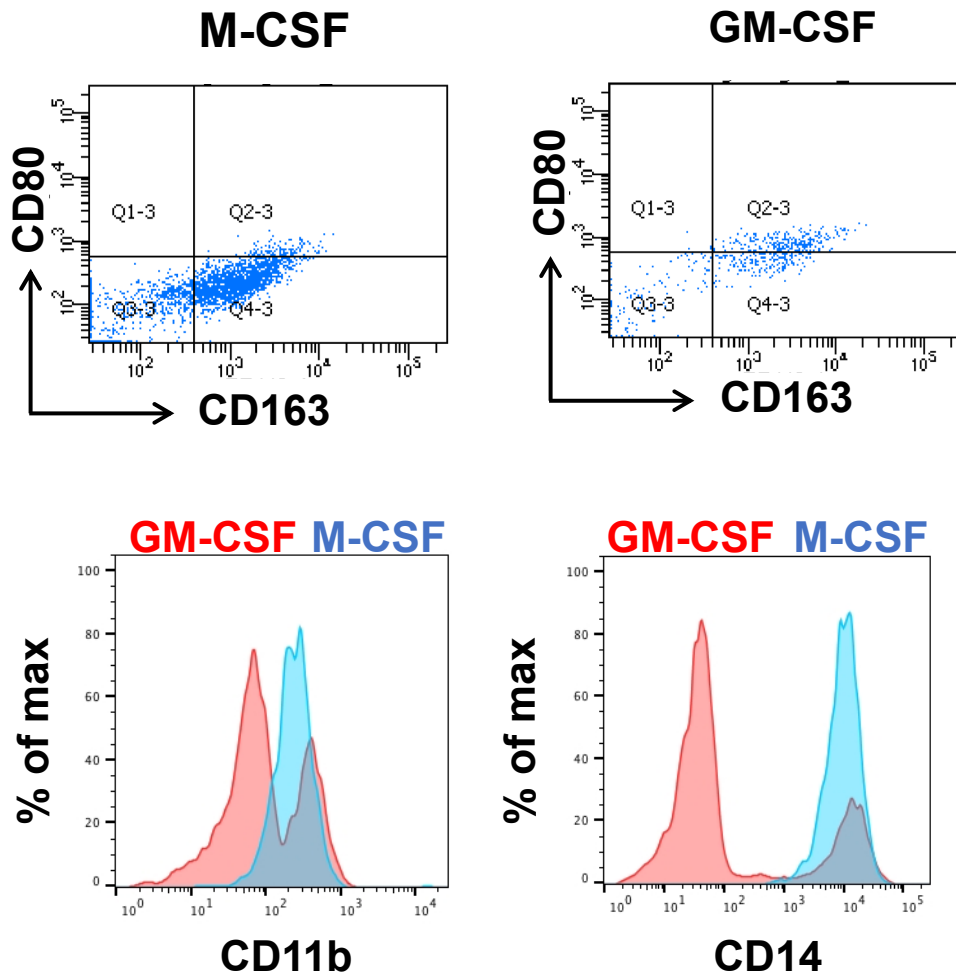

**Supplementary Fig. 3. Characters of 2D-iMACs differentiated with GM-CSF**

HSCs were cultured with 50 ng/ml M-CSF or 50 ng/ml GM-CSF for 7 days and analyzed with FACS. A total of 10,000 cells were analyzed in both samples. While GM-CSF increased the expression level of CD80 (upper figures), it generated CD11b<sup>-</sup>/CD14<sup>-</sup> populations as well (lower figures), resulting in low final cell numbers of differentiated macrophages.

**A**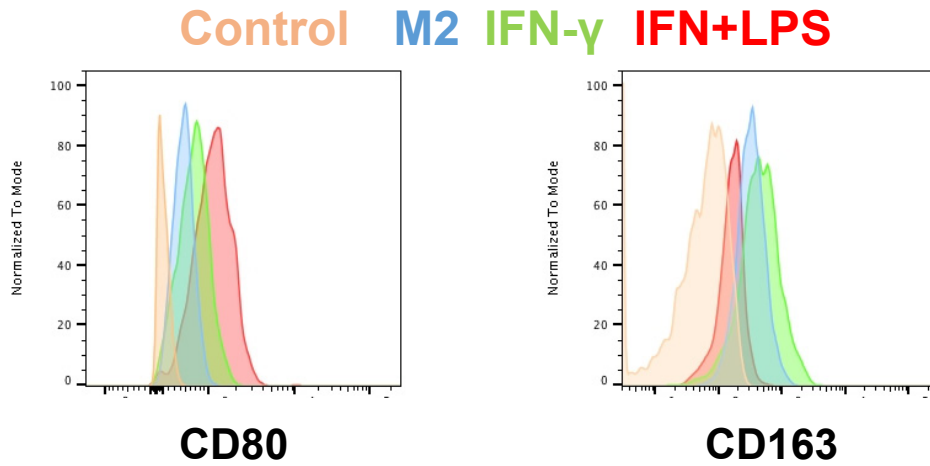**B**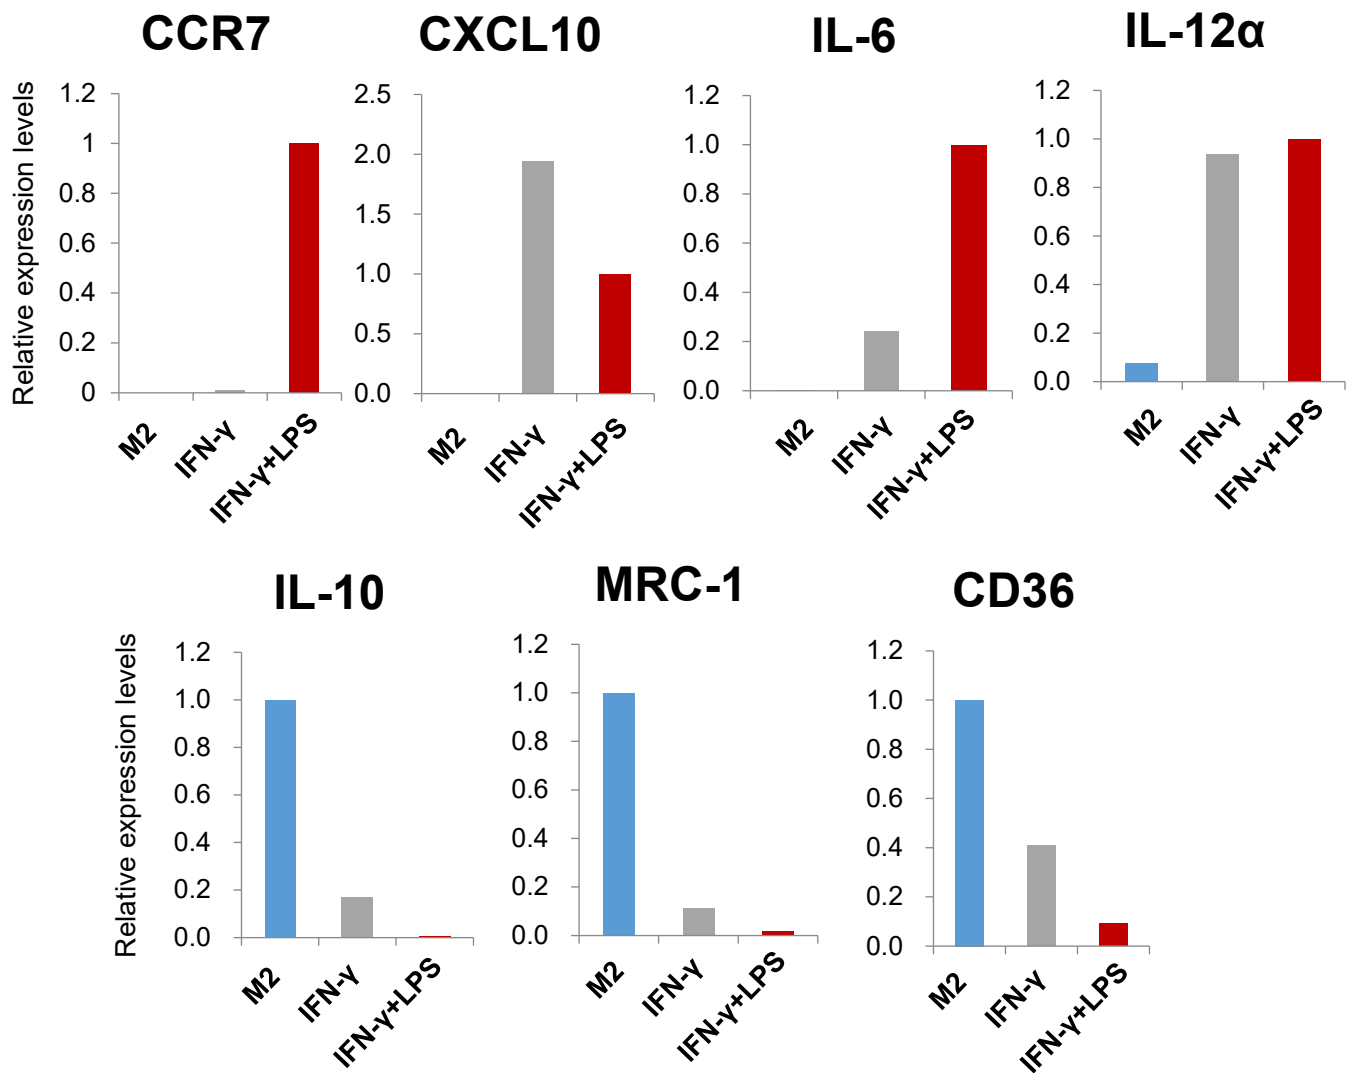

**Supplementary Fig. 4. Characteristics of iMACs polarized with IFN- $\gamma$  alone.**

A. Surface marker expression of CD80 and CD163. IFN- $\gamma$  treated iMACs showed higher expression of CD80 and CD163 than M2-iMACs. IFN- $\gamma$ -treated iMACs were compared with M2-iMACs and IFN- $\gamma$ /LPS-treated iMACs. WTC-11 was used for this analysis. B. mRNA expression levels of macrophage-related genes. IFN- $\gamma$ +LPS-treated iMACs showed higher expression of M1-related genes (upper) and lower M2-related genes (lower). Gene expression levels were normalized to those of  $\beta$ -actin. WTC-11 was used for this analysis (n=1) with technical triplicates.

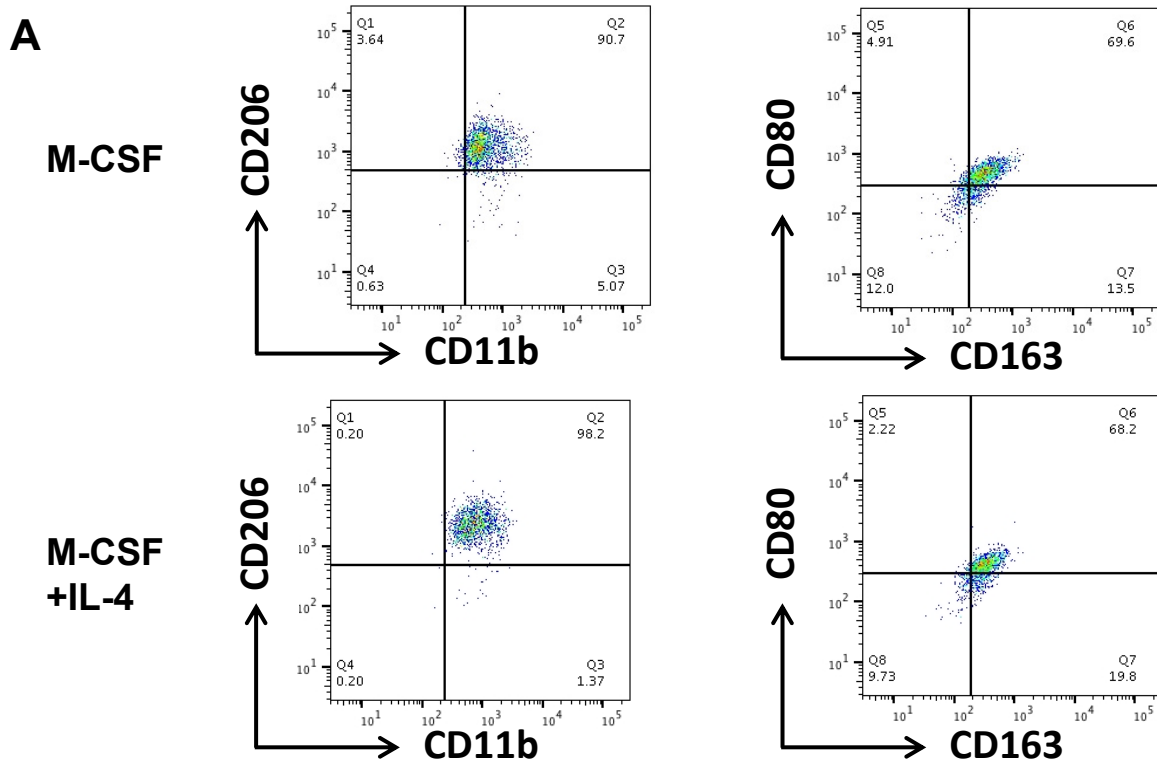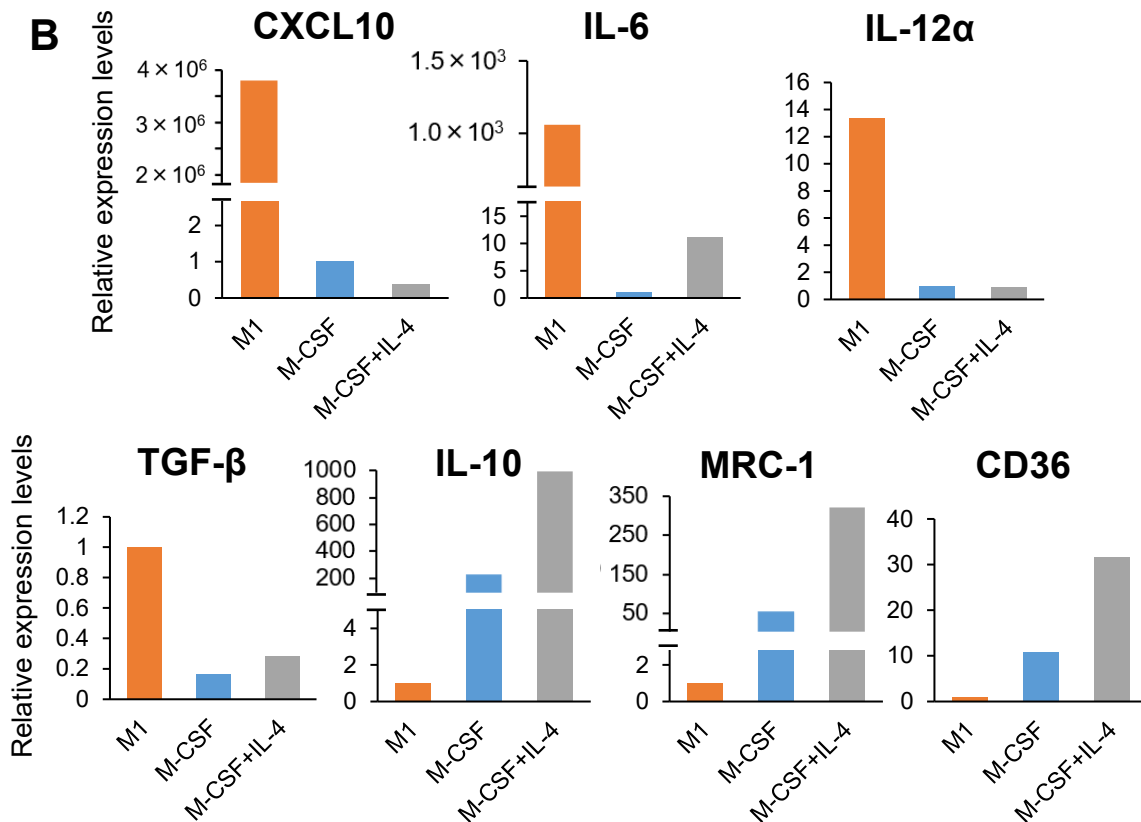

**Supplementary Fig. 5. Characteristics of 2D-iMACs polarized with IL-4.**

A. Surface marker expression patterns of iMACs treated with IL-4. CD206 expression was slightly elevated but neither CD80 nor CD163 were changed. WtC-11 was used for this analysis. B. mRNA expression levels of macrophage-related genes. IL-4 upregulated the M2-related gene expressions including IL-10, MRC-1 and CD36, but the effect was relatively small compared with that of M1-polarization. Gene expression levels were normalized to those of  $\beta$ -actin. Expression levels of upper three gene and lower four genes were shown as relative expression levels to M-CSF group and M1 group, respectively. WtC-11 was used for this analysis (n=1) with technical triplicates.

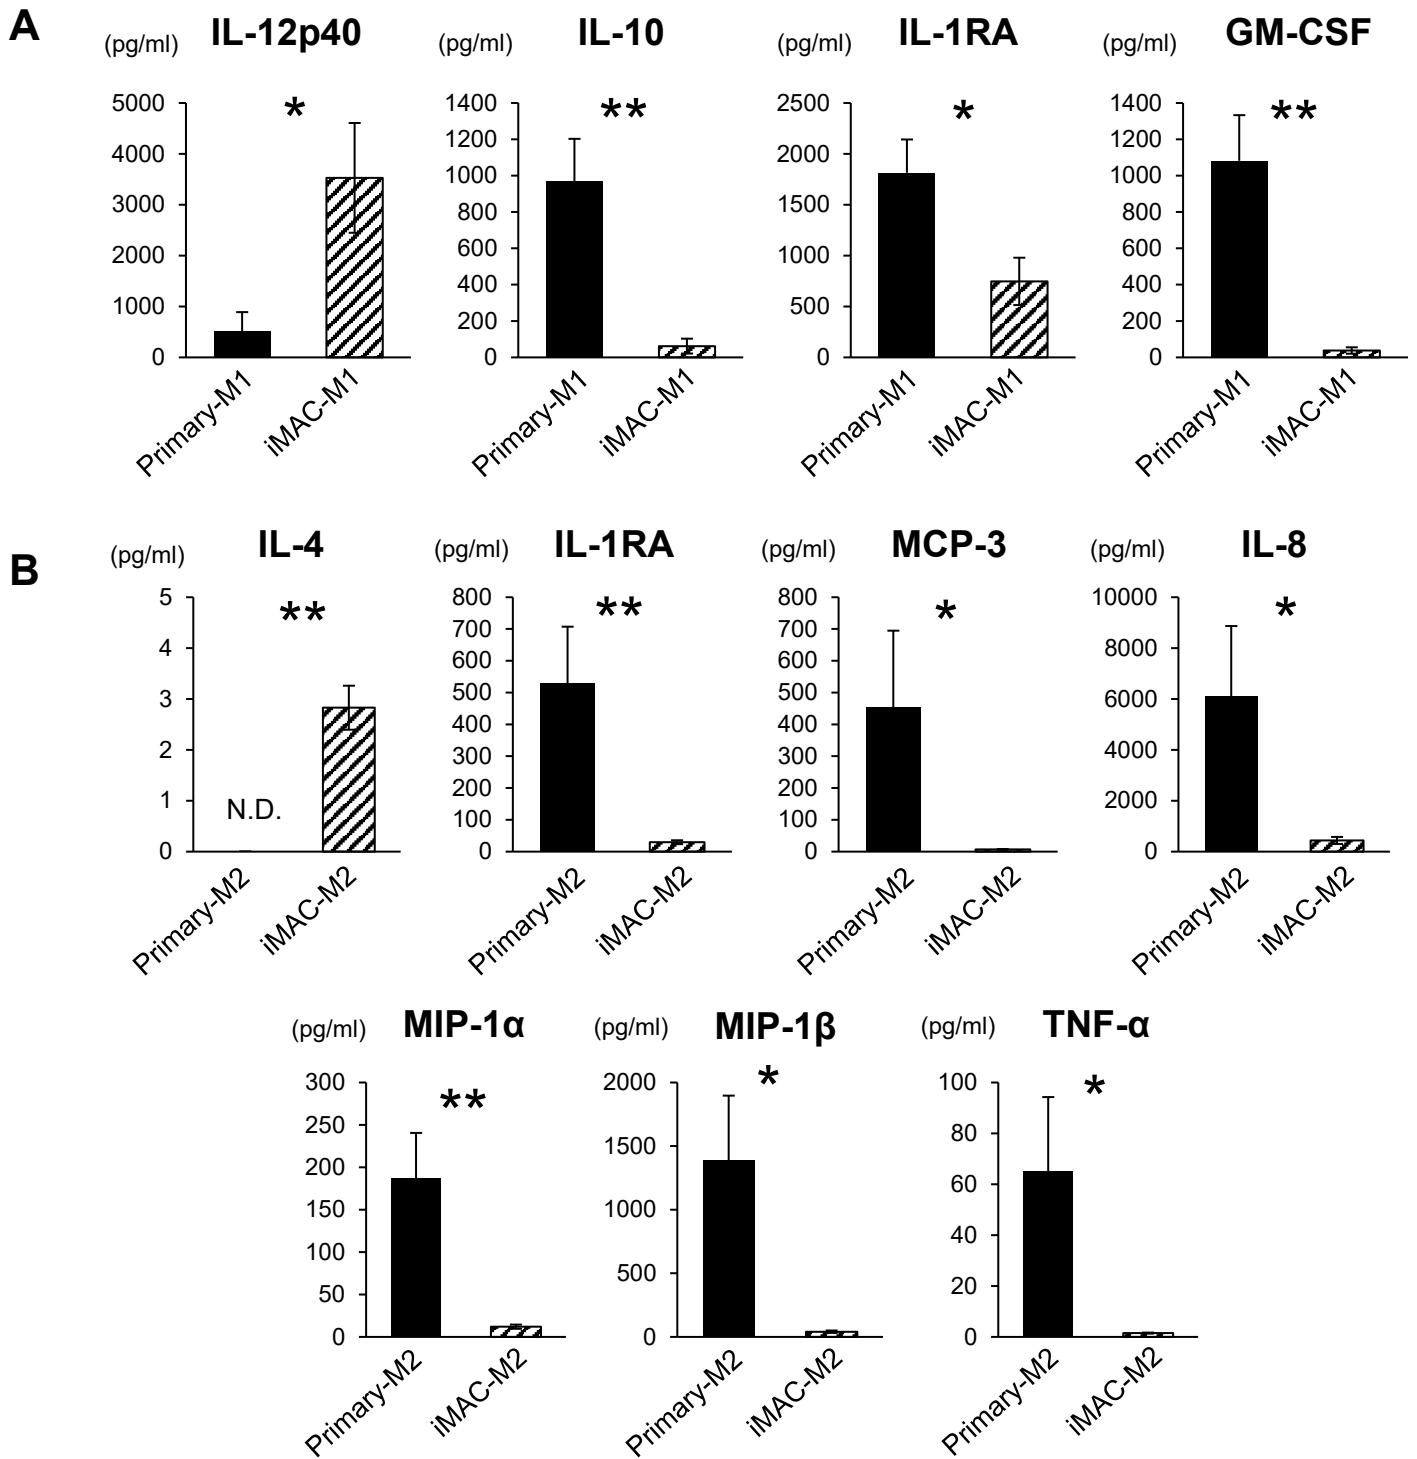

**Supplementary Fig. 6. Cytokine concentrations showing significant differences between primary macrophages and 2D-iMACs.**

A. Comparison between primary M1 macrophages and M1-like 2D-iMACs are shown. Student's *t*-test was used for comparison of two groups. \* $p < 0.05$ . \*\* $p < 0.01$ . Data represent mean  $\pm$  SEM of four to five independent experiments ( $n = 4-5$ ) with technical triplicates. B. Comparison between primary M2-like macrophages and M2-like 2D-iMACs are shown. Student's *t*-test was used for comparison of two groups. \* $p < 0.05$ . \*\* $p < 0.01$ . Data represent mean  $\pm$  SEM of independent experiments ( $n=4-6$ ) with technical triplicates. N.D.; not detectable.

**A**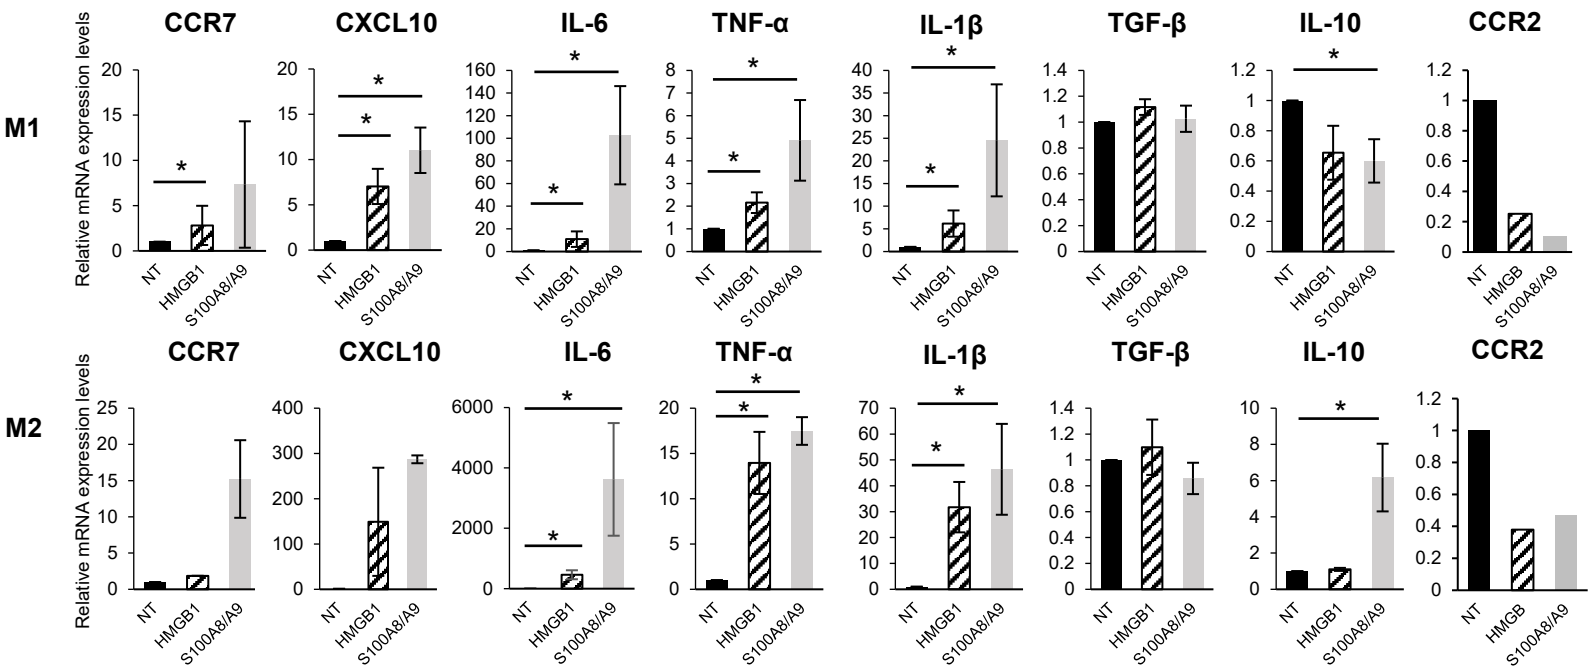**B**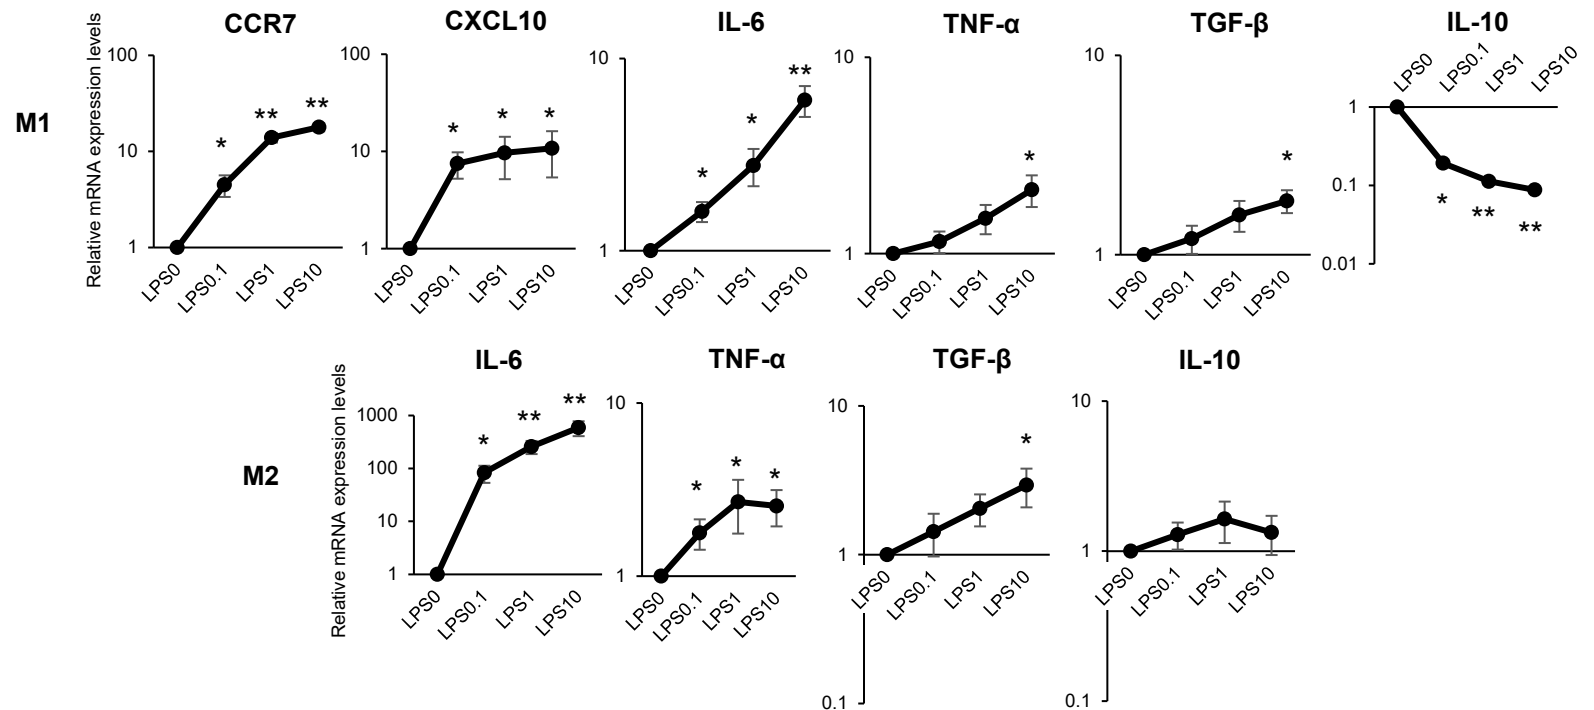

### Supplementary Fig. 7. Response to PAMP (LPS) and DAMPs (HMGB1, S100A8/A9) stimulations in 2D-iMACs.

A. qPCR analysis of representative cytokine genes in M1-like and M2-like 2D-iMACs stimulated with HMGB1 or S100A8/A9. Both M1-like and M2-like iMACs showed significant changes in various pro-inflammatory cytokines including IL-6, TNF- $\alpha$ , IL-1 $\beta$ . Gene expression changes of IL-10 were opposite between M1-like and M2-like iMACs. Expression levels are normalized to levels of a housekeeping gene,  $\beta$ -actin. Steel-Dwass test was used to compare each group. \* $p < 0.05$ , \*\* $p < 0.01$ . Data represent mean  $\pm$  SEM of independent experiments ( $n=4$ ) with technical triplicates.

B. qPCR analysis of representative cytokine genes in M1-like and M2-like 2D-iMACs stimulated with different concentrations of LPS (0.1, 1, and 10 ng/ml). Pro-inflammatory cytokine genes in M1-iMACs were significantly upregulated after stimulation. WTc11 was used for this experiment. Expression levels are normalized to levels of a housekeeping gene,  $\beta$ -actin. Shirley-Williams test was used to compare each group to control. \* $p < 0.05$ , \*\* $p < 0.01$ . Data represent mean  $\pm$  SEM of independent experiments ( $n=3$ ) with technical triplicates.

**A**

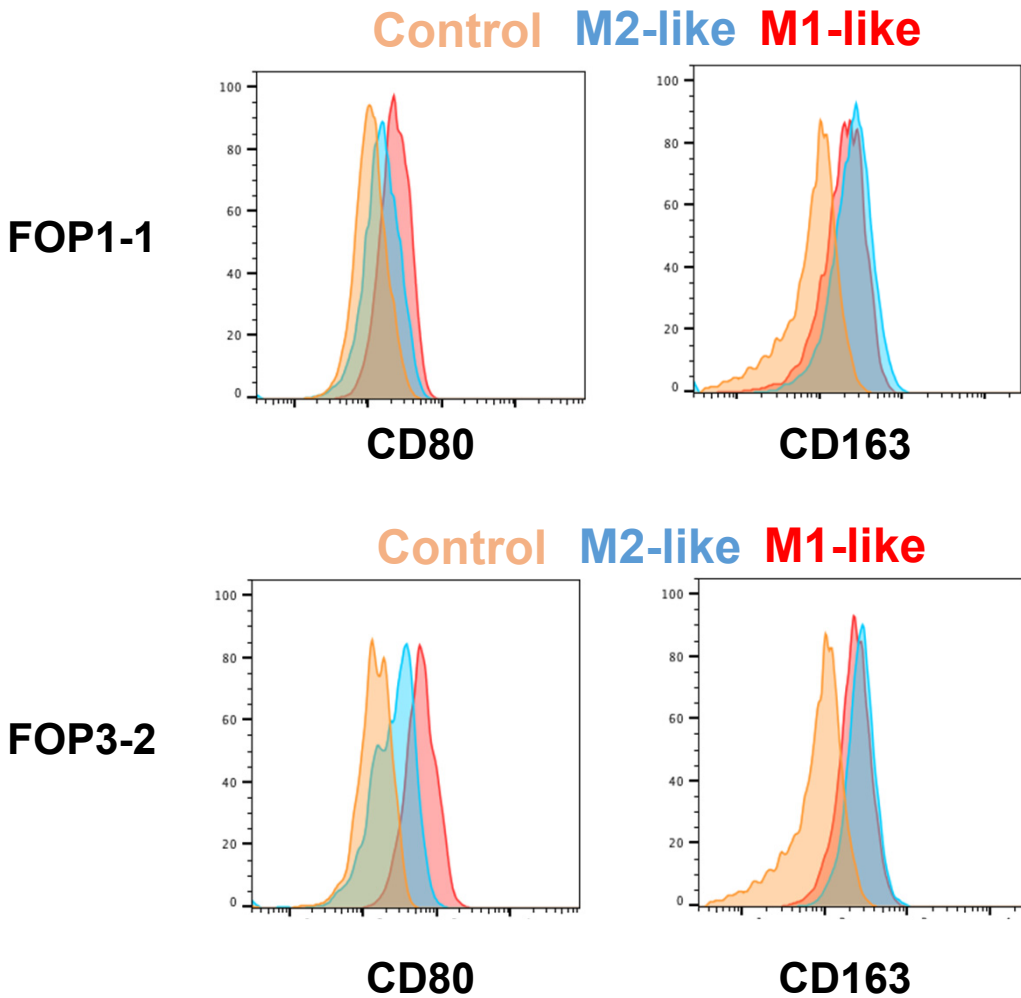

**B**

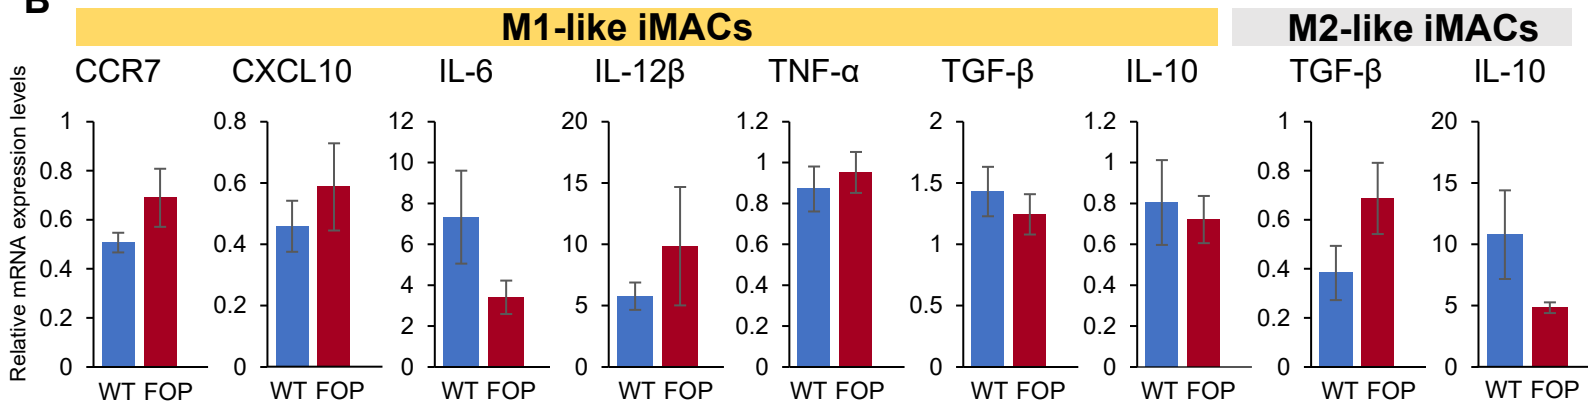

**Supplementary Fig. 8. Surface marker and gene expression of polarized FOP-2D-iMACs**

A. iMACs were generated using 2D-culture protocol and polarized with or without IFN-gamma + LPS for 24 hours. After M1 polarization, expression levels of CD80 were increased and that of CD163 were decreased in both FOP-derived cell lines in the same manner as WT-iMACs.

B. qPCR analysis of representative cytokine genes in WT- and FOP-2D-iMACs. Cells were harvested and analyzed just after their polarization into M1-like or M2-like phenotype. There were no significant differences between two groups. Expression levels are normalized to levels of a housekeeping gene,  $\beta$ -actin. Student's t-test was used for comparison of two groups. \* $p < 0.05$ . Data represent mean  $\pm$  SEM of independent experiments (n=8) with technical triplicates.



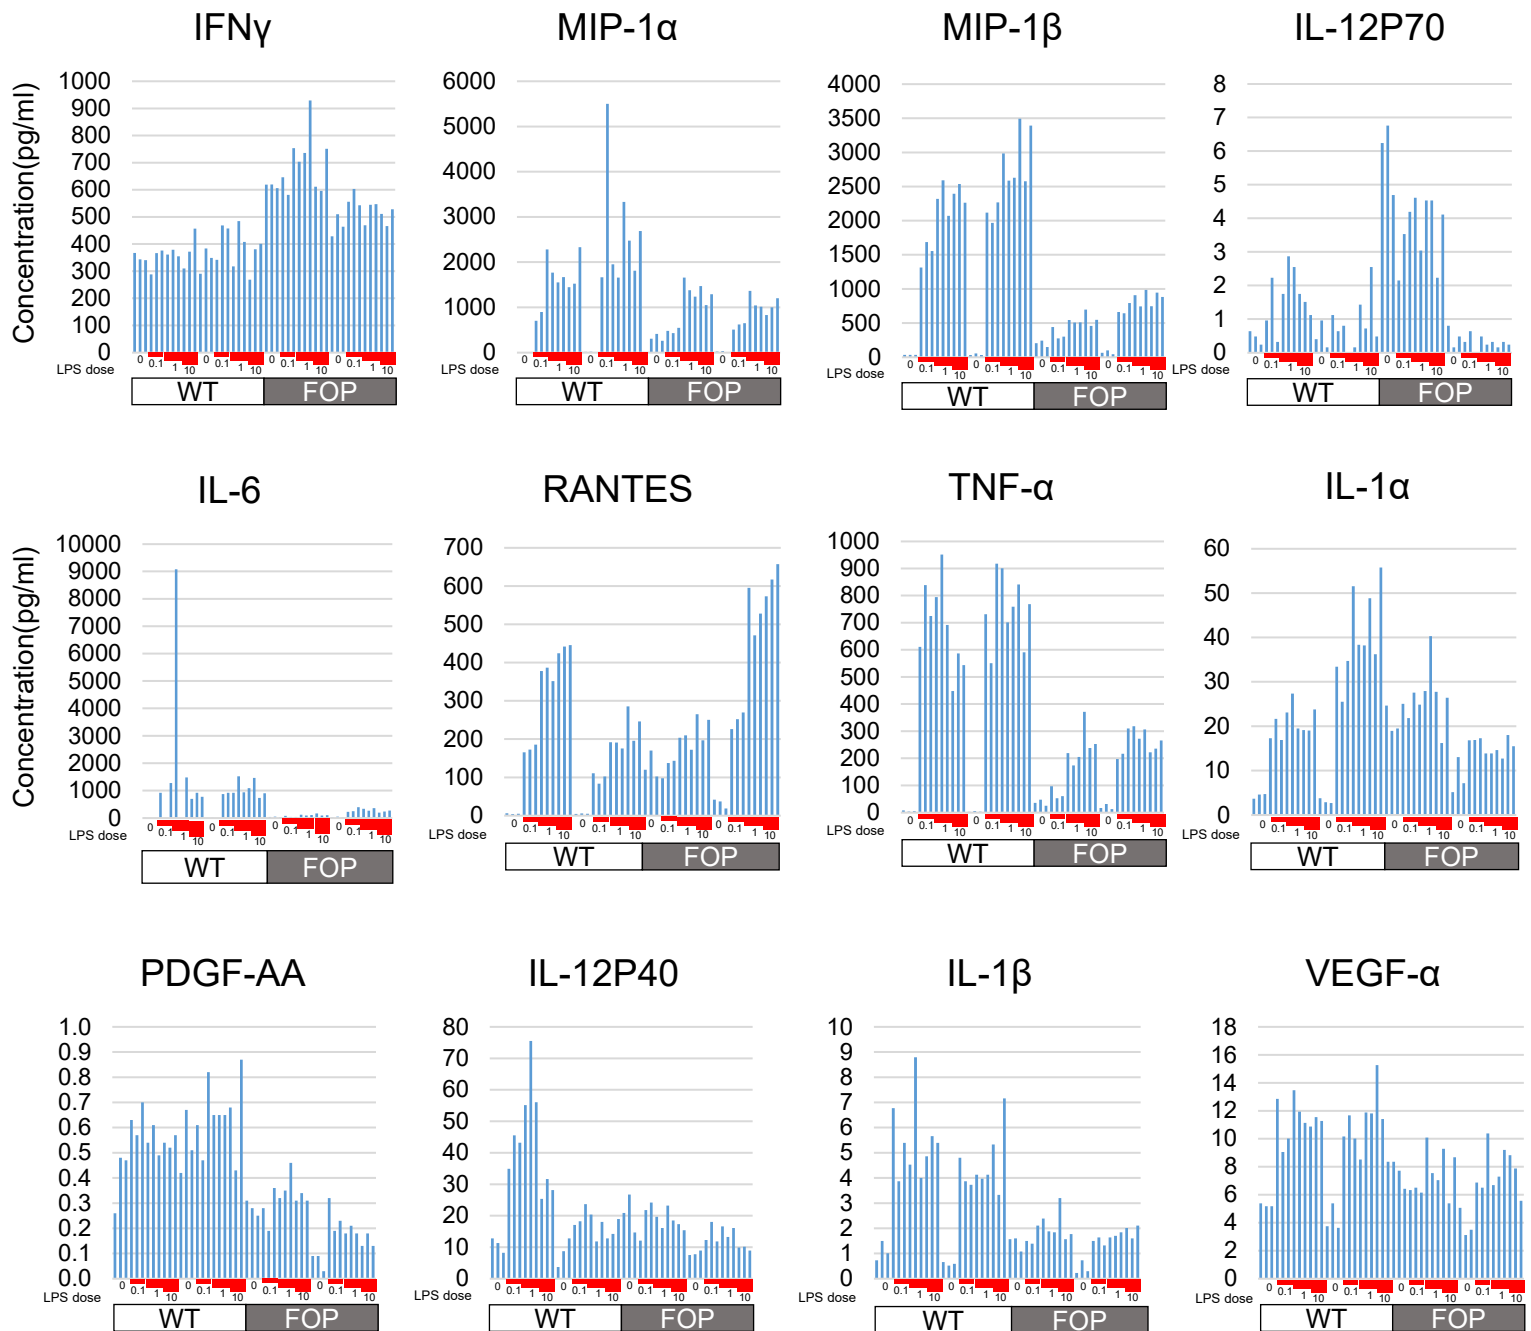

**Supplementary Fig. 9. Cytokine concentrations secreted by M1-like iMACs stimulated with 0.1-10 ng/ml LPS.**

iMACs were stimulated with different concentrations of LPS for 24 hours. Representative pro-inflammatory cytokine genes are shown here. Cytokine levels with the lowest dose of LPS were mostly equivalent to those with the highest dose of LPS. While RANTES and MIP-1 $\alpha$  seem to have mild dose-dependencies, they don't have significant differences regarding the trend between WT- and FOP-iMACs.

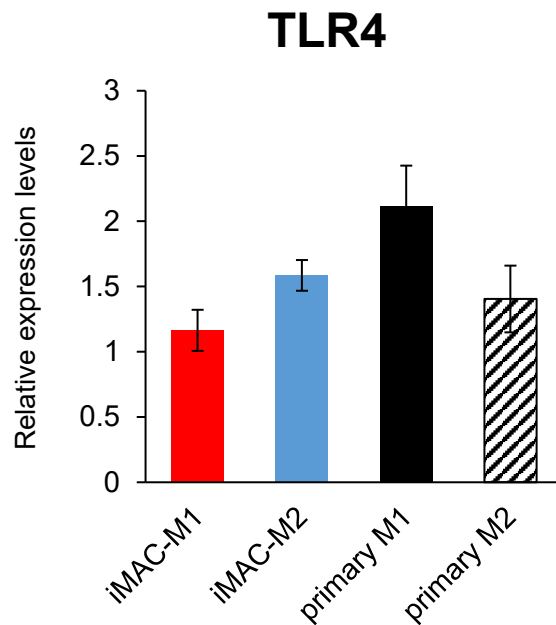

**Supplementary Fig. 10. Comparison of TLR4 expressions between 2D-iMACs and primary macrophages** mRNA expression levels of TLR4 are shown. No significant differences were found between 2D-iMACs and primary macrophages regarding their expression levels of TLR4. Gene expression levels were normalized to those of  $\beta$ -actin. Statistical analysis was performed by one-way analysis of variance (ANOVA) followed by the Tukey-Kramer test. Data represent mean  $\pm$  SEM of four to five independent experiments with technical triplicates.

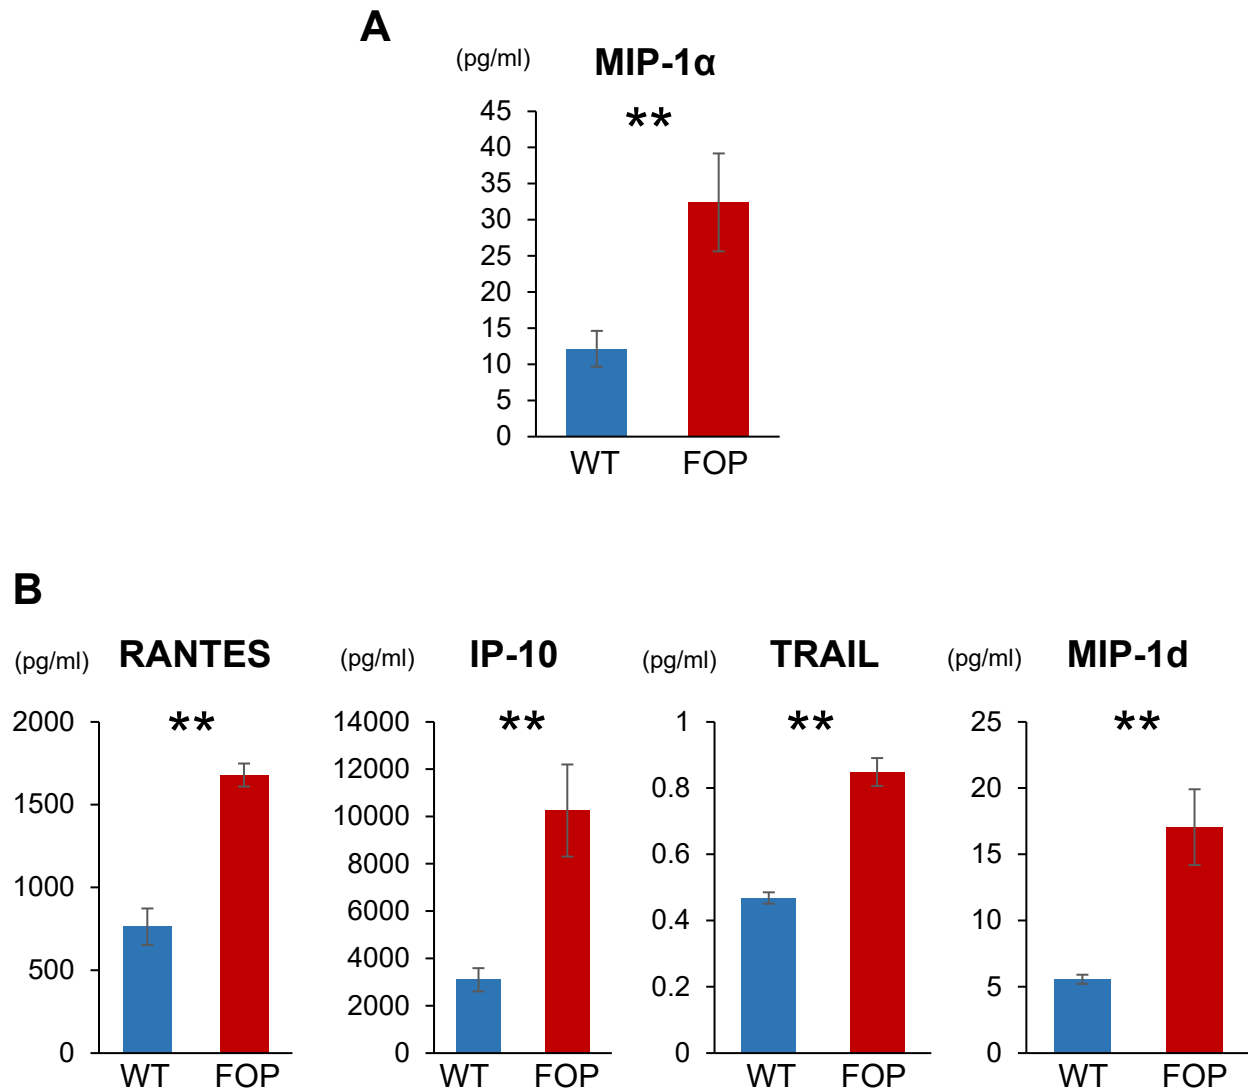

**Supplementary Fig. 11. Cytokine concentrations showing significant differences between WT- and FOP-M2-like iMACs.**

A. The concentrations of MIP-1 $\alpha$  was significantly higher in FOP-M2-like iMACs without LPS stimulation (NT). Student's *t*-test was used for comparison of two groups. \*\* $p < 0.01$ . Data represent mean  $\pm$  SEM of six independent experiments with technical triplicates.

B. The concentrations of RANTES, IP-10, TRAIL, and MIP-1d were significantly higher in FOP-M2-like iMACs when stimulated with 10ng/ml LPS. Student's *t*-test was used for comparison of two groups. \*\* $p < 0.01$ . Data represent mean  $\pm$  SEM of independent experiments ( $n = 6$ ) with technical triplicates.

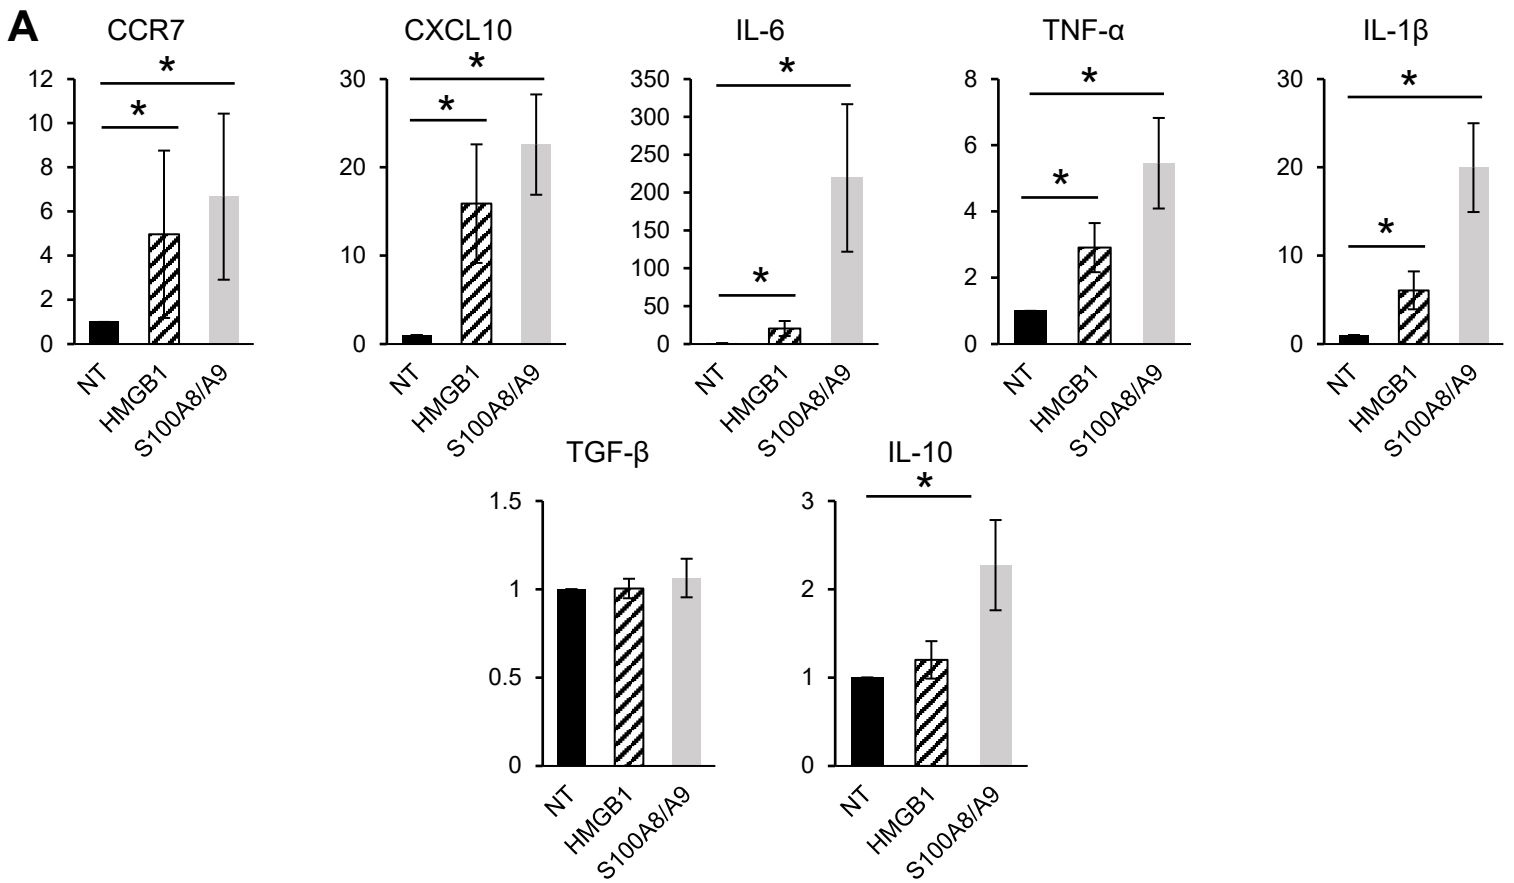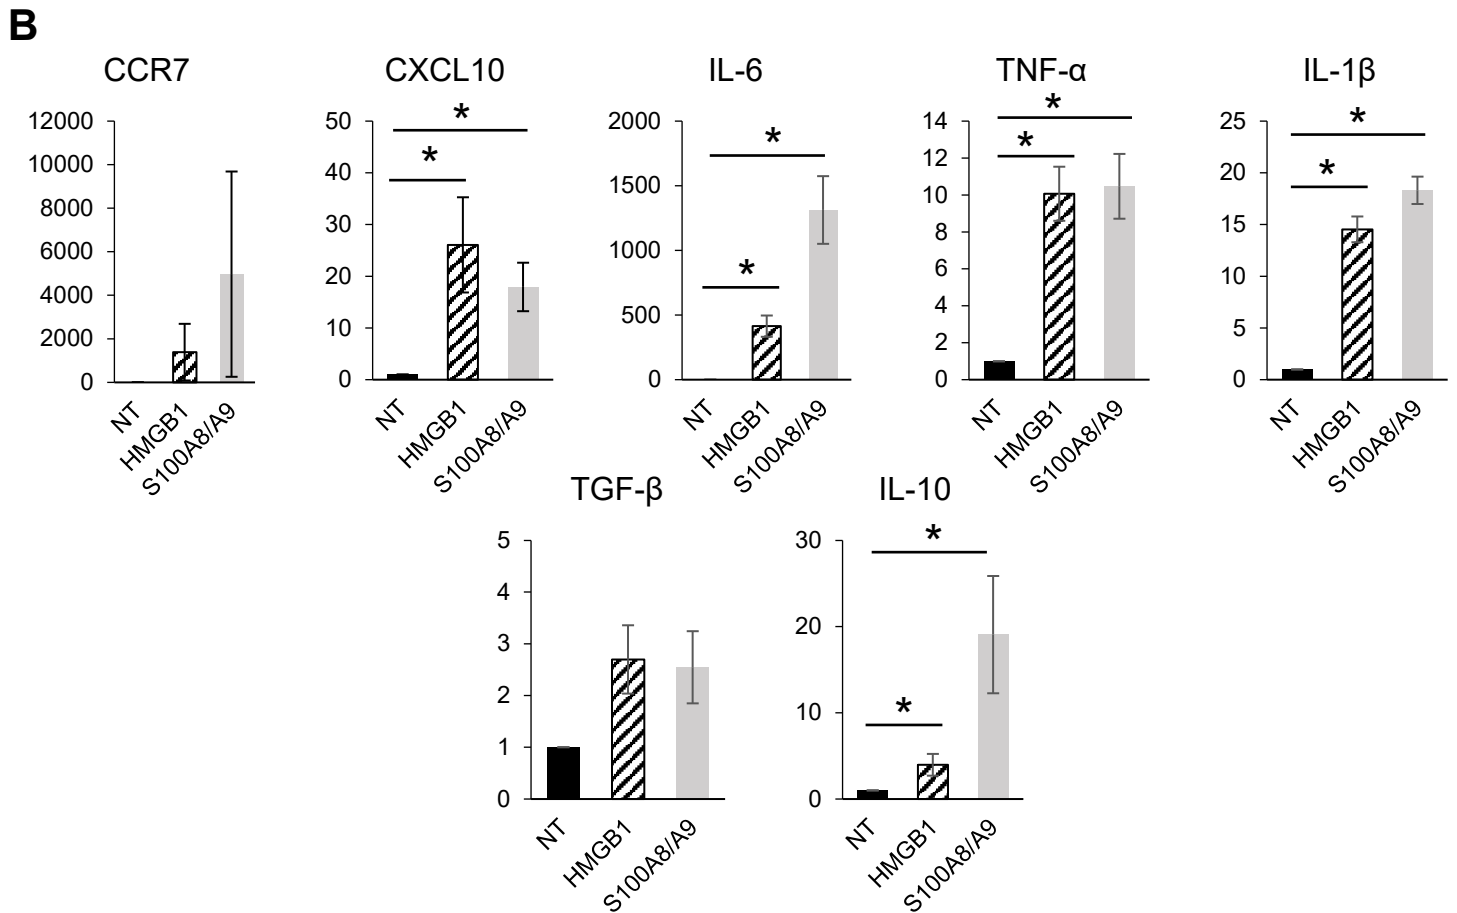

**Supplementary Fig. 12. Response to DAMPs (HMGB1, S100A8/A9) stimulation in FOP-M1-like and M2-like iMACs.** A. mRNA expression levels of key cytokine genes in FOP-M1-like iMACs were shown. B. mRNA expression levels of key cytokine genes in FOP-M2-like iMACs were shown. Gene expression levels were normalized to those of  $\beta$ -actin. Statistical analysis was performed by Steel-Dwass test. Data represent mean  $\pm$  SEM of independent experiments ( $n = 4$ ) with technical triplicates. \* $p < 0.05$ , \*\* $p < 0.01$ .

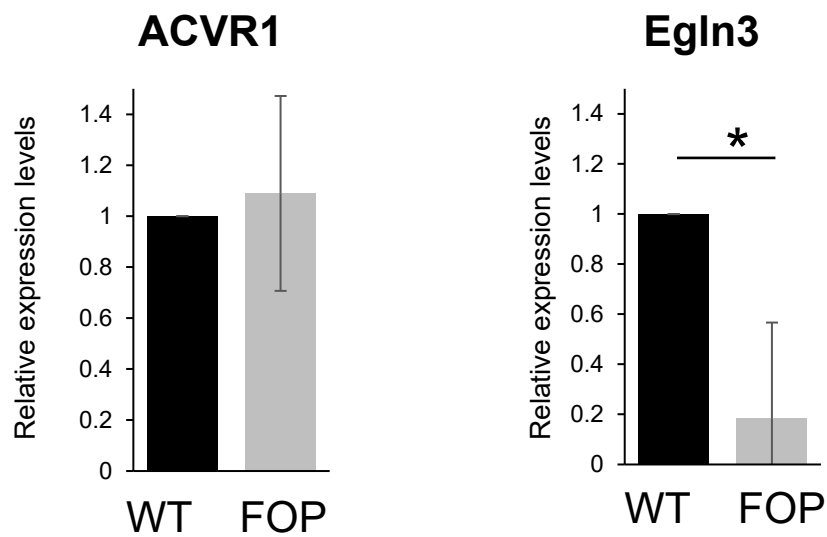

**Supplementary Fig. 13. Comparison of ACVR1 and Egln3 expression between WT- and FOP-iMACs.** ACVR1 expression was not significantly different between WT- and FOP-iMACs. In addition, Egln3 expression level was downregulated in FOP-iMACs. Student's t-test was used for comparison. \* $p < 0.05$ . Data represent mean  $\pm$  SEM of independent experiments ( $n=3$ ) with technical triplicates

| <b>Name</b> | <b>Company</b> | <b>Catalog number</b> | <b>Conjugate</b> | <b>Dilution</b> |
|-------------|----------------|-----------------------|------------------|-----------------|
| CD34        | eBioscience    | 11-0349-42            | FITC             | 1:100           |
| CD45        | eBioscience    | 12-9459-42            | PE               | 1:100           |
| CD14        | eBioscience    | 25-0149-42            | PE-Cyanine7      | 1:100           |
| CD11b       | eBioscience    | 11-0118-42            | FITC             | 1:100           |
| CD11b       | eBioscience    | 17-0118-42            | APC              | 1:100           |
| CD163       | eBioscience    | 12-1639-42            | PE               | 1:100           |
| CD206       | eBioscience    | 17-2069-42            | APC              | 1:100           |
| CD80        | eBioscience    | 46-0809-42            | PerCP-eFlour 710 | 1:100           |
| CD68        | eBioscience    | 11-0689-42            | FITC             | 1:100           |
| CD3         | eBioscience    | 17-0038-42            | APC              | 1:100           |

**Supplementary Table 1. Antibodies used for Flow Cytometry**

| Gene          | Assays ID     |
|---------------|---------------|
| ACTB          | Hs01060665_g1 |
| INHBA         | Hs1081598_m1  |
| CCR7          | Hs01013469_m1 |
| CD36          | Hs00169627_m1 |
| CXCL10        | Hs01124251_g1 |
| IL10          | Hs00961622_m1 |
| IL1B          | Hs01555410_m1 |
| IL6           | Hs00174131_m1 |
| IL12A         | Hs01073447_m1 |
| IL12B         | Hs01011518_m1 |
| MRC1          | Hs00267207_m1 |
| TGFB1         | Hs00998133_m1 |
| TNF- $\alpha$ | Hs00174128_m1 |
| TLR4          | Hs00152939_m1 |
| CCR2          | Hs00704702_s1 |
| Egln3         | Hs00222966_m1 |

| Gene    | Sybr Green                     |
|---------|--------------------------------|
| CD3e F  | TGC TGC TGG TTT ACT ACT GGA    |
| CD3e R  | GGA TGG GCT CAT AGT CTG GG     |
| CD19 F  | GGC CCG AGG AAC CTC TAG T      |
| CD19 R  | TAA GAA GGG TTT AAG CGG GGA    |
| CD56 F  | GGC ATT TAC AAG TGT GTG GTT AC |
| CD56 R  | TTG GCG CAT TCT TGA ACA TGA    |
| GAPDH F | ATG TTT GTG ATG GGT GTGAA      |
| GAPDH R | ATG CCA AAG TTG TCA TGG AT     |

**Supplementary Table 2. Taqman and Sybr Green primers for human gene expression**
